# Supplementary material
Source: PubMed Central journal article supplement (PMC6983323)
Supplement: EMS85062-supplement-Appendices.pdf [file EMS85062-supplement-Appendices.pdf]

## Appendix 1: Search Strategy

Papers included in this review were identified using the following search strategy (adapted from the Cochrane Mental disorders search strategy at <https://cmd-cochrane.org/search-strategies-identification-studies>), executed on 5<sup>th</sup> May 2019. Modified MeSH terms were used for EMBASE/ PsychINFO databases:

1. EATING DISORDERS/ or ANOREXIA NERVOSA/ or BINGE-EATING DISORDER/ or BULIMIA NERVOSA/ or FEMALE ATHLETE TRIAD SYNDROME/ or PICA/
2. HYPERPHAGIA/ or BULIMIA/
3. SELF-INJURIOUS BEHAVIOR/ or SELF MUTILATION/ or SUICIDE/ or SUICIDAL IDEATION/ or SUICIDE, ATTEMPTED/
4. MOOD DISORDERS/ or AFFECTIVE DISORDERS, PSYCHOTIC/ or BIPOLAR DISORDER/ or CYCLOTHYMIC DISORDER/ or DEPRESSIVE DISORDER/ or DEPRESSION, POSTPARTUM/ or DEPRESSIVE DISORDER, MAJOR/ or DEPRESSIVE DISORDER, TREATMENT-RESISTANT/ or DYSTHYMIC DISORDER/ or SEASONAL AFFECTIVE DISORDER/
5. NEUROTIC DISORDERS/
6. DEPRESSION/
7. ADJUSTMENT DISORDERS/
8. exp ANTIDEPRESSIVE AGENTS/
9. ANXIETY DISORDERS/ or AGORAPHOBIA/ or NEUROCIRCULATORY ASTHENIA/ or OBSESSIVE-COMPULSIVE DISORDER/ or OBSESSIVE HOARDING/ or PANIC DISORDER/ or PHOBIC DISORDERS/ or STRESS DISORDERS, TRAUMATIC/ or COMBAT DISORDERS/ or STRESS DISORDERS, POST-TRAUMATIC/ or STRESS DISORDERS, TRAUMATIC, ACUTE/
10. ANXIETY/ or ANXIETY, CASTRATION/ or KORO/
11. ANXIETY, SEPARATION/
12. PANIC/
13. exp ANTI-ANXIETY AGENTS/
14. SOMATOFORM DISORDERS/ or BODY DYSMORPHIC DISORDERS/ or CONVERSION DISORDER/ or HYPOCHONDRIASIS/ or NEURASTHENIA/
15. HYSTERIA/
16. MUNCHAUSEN SYNDROME BY PROXY/ or MUNCHAUSEN SYNDROME/
17. FATIGUE SYNDROME, CHRONIC/
18. OBSESSIVE BEHAVIOR/
19. COMPULSIVE BEHAVIOR/ or BEHAVIOR, ADDICTIVE/
20. IMPULSE CONTROL DISORDERS/ or FIRESETTING BEHAVIOR/ or GAMBLING/ or TRICHOTILLOMANIA/
21. STRESS, PSYCHOLOGICAL/ or BURNOUT, PROFESSIONAL/
22. SEXUAL DYSFUNCTIONS, PSYCHOLOGICAL/ or VAGINISMUS/
23. ANHEDONIA/
24. AFFECTIVE SYMPTOMS/
25. \*MENTAL DISORDERS/
26. (eating disorder\* or anorexia nervosa or bulimi\* or binge eat\* or (self adj (injur\* or mutilat\*)) or suicide\* or suicidal or parasuicid\* or mood disorder\* or affective disorder\* or bipolar i or bipolar ii or (bipolar and (affective or disorder\*)) or mania or manic or cyclothymic\* or depression or depressive or dysthymi\* or neurotic or neurosis or adjustment disorder\* or antidepress\* or anxiety disorder\* or agoraphobia or obsess\* or compulsi\* or panic or phobi\* or ptsd or posttrauma\* or post trauma\* or combat or

somatoform or somatization or medical\* unexplained or body dysmorphic\* or conversion disorder or hypochondria\* or neurasthenia\* or hysteria or munchausen or chronic fatigue\* or gambling or trichotillomania or vaginismus or anhedonia\* or affective symptoms or mental disorder\* or mental health)-ti-

27. Schizophrenia/ or schizophrenia.mp
28. depression.mp or Depression/
29. major depressive disorder.mp or Depressive Disorder, Major/
30. dementia.mp or Dementia/ or Frontotemporal Dementia/ or Dementia, Vascular/ or Dementia, Multi-Infarct/
31. autism.mp or Autistic Disorder/
32. eating disorder.mp or "Feeding and Eating Disorders"/
33. Borderline Personality Disorder/ or Mental Disorders/ or borderline personality.mp or Personality Disorders/
34. psychosis.mp or Psychotic Disorders/
35. exp "psychiatry and psychology (non mesh)"/ or psychiatry/
36. Attention Deficit Disorder with Hyperactivity/ or ADHD.mp./ or "attention deficit and disruptive behavior disorders"/ or child behavior disorders/
37. neurodevelopmental disorder.mp. or Neurodevelopmental Disorders/
38. communication disorders/ or language disorders/ or dyslexia/ or language development disorders/ or speech disorders/ or learning disorders/ or intellectual disability/
39. Developmental Disabilities/ or Motor Skills Disorders/ or motor delay.mp.
40. 1 OR 2 OR 3 OR 4 OR 5 OR 6 OR 7 OR 8 OR 9 OR 10 OR 11 OR 12 OR 13 OR 14 OR 15 OR 16 OR 17 OR 18 OR 19 OR 20 OR 21 OR 22 OR 23 OR 24 OR 25 OR 26 OR 27 OR 28 OR 29 OR 30 OR 31 OR 32 OR 33 OR 34 OR 35 OR 36 OR 37 OR 38 OR 39
41. mendelian adj2 random\*
42. Mendelian Randomization Analysis/ or mendelian randomization.mp
43. instrumental adj2 variable
44. 41 OR 42OR 43
45. 40 AND 44

**Appendix 2: Flow chart for identification and inclusion of studies** (Numbers for inclusion do not add up to 26 as some studies investigated multiple outcomes)

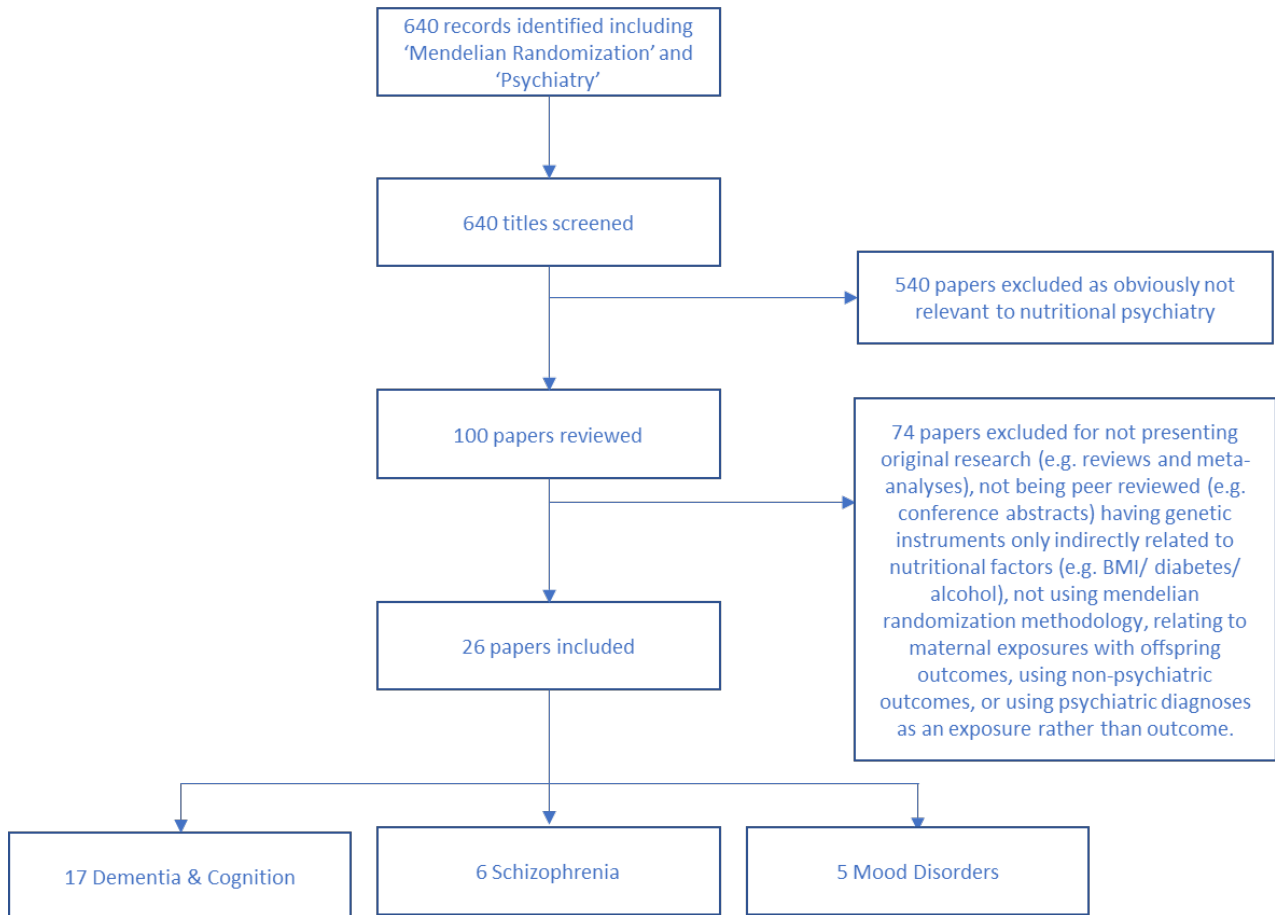

**Appendix 3: Excluded papers**

The following papers were identified in the search strategy as potentially relevant. Reasons for exclusion from the current review is given where appropriate.

|  | Paper | Justification for exclusion |
|--|-------|-----------------------------|
|  |       |                             |

|    |                                                                                                                                                                                                                                                                                                                       |                                                                  |
|----|-----------------------------------------------------------------------------------------------------------------------------------------------------------------------------------------------------------------------------------------------------------------------------------------------------------------------|------------------------------------------------------------------|
| 1  | Arafat, S. and C. C. Minica (2018). "Fetal origins of mental disorders? An answer based on Mendelian randomization." <u>Twin Research and Human Genetics</u> <b>21</b> (6): 485-494.                                                                                                                                  | Exposure (birth weight)                                          |
| 2  | Belbasis, L., et al. (2018). "Risk factors and peripheral biomarkers for schizophrenia spectrum disorders: An umbrella review of meta-analyses." <u>Acta Psychiatrica Scandinavica</u> <b>137</b> (2): 88-97.                                                                                                         | Review                                                           |
| 3  | Benn, M., et al. "Low LDL cholesterol, PCSK9 and HMGCR genetic variation, and risk of Alzheimer's disease and Parkinson's disease: Mendelian randomisation study." <u>BMJ</u> <b>357</b> : j1648.                                                                                                                     | Included                                                         |
| 4  | Benn, M., et al. (2018). "Glucose and risk of Alzheimer's dementia, vascular dementia and unspecified dementia." <u>Circulation. Conference</u> <b>138</b> (Supplement 1).                                                                                                                                            | Conference abstract                                              |
| 5  | Bjorngaard, J. H., et al. (2015). "Association of body mass index with depression, anxiety and suicide - An instrumental variable analysis of the HUNT study." <u>PLoS ONE</u> <b>10</b> (7) (no pagination)(e0131708).                                                                                               | Exposure (BMI)                                                   |
| 6  | Bonilla, C., et al. "Maternal and offspring fasting glucose and type 2 diabetes-associated genetic variants and cognitive function at age 8: a Mendelian randomization study in the Avon Longitudinal Study of Parents and Children." <u>BMC Medical Genetics</u> <b>13</b> : 90.                                     | Maternal/ Offspring                                              |
| 7  | Bonilla, C., et al. "Vitamin B-12 status during pregnancy and child's IQ at age 8: a Mendelian randomization study in the Avon longitudinal study of parents and children." <u>PLoS ONE [Electronic Resource]</u> <b>7</b> (12): e51084.                                                                              | Maternal/ Offspring                                              |
| 8  | Byrne, E., et al. (2019). "Investigating Causal Relationships between Major Depressive Disorder and Genetically Correlated Traits Using Mendelian Randomisation." <u>European Neuropsychopharmacology</u> <b>29</b> (Supplement 3): S791.                                                                             | Exposure (BMI/ education/ schizophrenia/ coronary heart disease) |
| 9  | Byrne, E. M., et al. "Inference in Psychiatry via 2-Sample Mendelian Randomization-From Association to Causal Pathway?" <u>JAMA Psychiatry</u> <b>74</b> (12): 1191-1192.                                                                                                                                             | Review                                                           |
| 10 | Caramaschi, D., et al. "Exploring a causal role of DNA methylation in the relationship between maternal vitamin B12 during pregnancy and child's IQ at age 8, cognitive performance and educational attainment: a two-step Mendelian randomization study." <u>Human Molecular Genetics</u> <b>26</b> (15): 3001-3013. | Maternal/ Offspring                                              |
| 11 | Chekroud, A. M. (2019). "A Mendelian Randomization Approach for Assessing the Relationship Between Physical Activity and Depression." <u>JAMA Psychiatry</u> <b>23</b> : 23.                                                                                                                                          | Exposure (physical activity)                                     |
| 12 | Cheng, W. W., et al. (2019). "Mineral Nutrition and the Risk of Chronic Diseases: A Mendelian Randomization Study." <u>Nutrients</u> <b>11</b> (2): 12.                                                                                                                                                               | Included                                                         |
| 13 | Choi, K. W., et al. (2019). "Assessment of Bidirectional Relationships Between Physical Activity and Depression Among Adults: A 2-Sample Mendelian Randomization Study." <u>JAMA Psychiatry</u> <b>23</b> : 23.                                                                                                       | Exposure (physical activity)                                     |
| 14 | Clarke, T.-K., et al. (2017). "Investigating shared aetiology between type 2 diabetes and major depressive disorder in a population based cohort." <u>American Journal of Medical Genetics Part B: Neuropsychiatric Genetics</u> <b>174</b> (3): 227-234.                                                             | Exposure (T2DM)                                                  |
| 15 | Cornelis, M. C. and M. R. Munafo (2018). "Mendelian Randomization Studies of Coffee and Caffeine Consumption." <u>Nutrients</u> <b>10</b> (10): 20.                                                                                                                                                                   | Review and Exposure (caffeine)                                   |

|    |                                                                                                                                                                                                                                                                                                                                                          |                            |
|----|----------------------------------------------------------------------------------------------------------------------------------------------------------------------------------------------------------------------------------------------------------------------------------------------------------------------------------------------------------|----------------------------|
| 16 | Cruchaga, C., et al. (2012). "Cerebrospinal fluid APOE levels: An endophenotype for genetic studies for Alzheimer's disease." <u>Human Molecular Genetics</u> <b>21</b> (20): 4558-4571.                                                                                                                                                                 | Exposure (CSF proteins)    |
| 17 | Fluegge Ba, K. "Zinc and Copper Metabolism and Risk of Autism: a reply to Sayehmiri et al." <u>Iranian Journal of Child Neurology</u> <b>11</b> (3): 66-69.                                                                                                                                                                                              | Methods (not MR)           |
| 18 | Fluegge, K. (2016). "A reply to Wang T, Shan L, Du L, Feng J, Xu Z, Staal WG, Jia F. Serum concentration of 25-hydroxyvitamin D in autism spectrum disorder: a systematic review and meta-analysis. <u>Eur Child Adolesc Psychiatry</u> . 2015; doi: 10.1007/s00787-015-0786-1." <u>European Child and Adolescent Psychiatry</u> <b>25</b> (4): 453-454. | Response                   |
| 19 | Fluegge, K. (2017). "Zinc and copper metabolism and risk of autism: A reply to Sayehmiri et al." <u>Iranian Journal of Child Neurology</u> <b>11</b> (3): 66-69.                                                                                                                                                                                         | Response                   |
| 20 | Frangou, S., et al. (2019). "Insulin resistance: Genetic associations with depression and cognition in population based cohorts." <u>Experimental Neurology</u> <b>06</b> : 06.                                                                                                                                                                          | Methods (non-MR)           |
| 21 | Giltay, E. J., et al. (2009). "Serum cholesterol, apolipoprotein E genotype and depressive symptoms in elderly European men: The FINE study." <u>Journal of Affective Disorders</u> <b>115</b> (3): 471-477.                                                                                                                                             | Included                   |
| 22 | Grant, W. B. (2017). "Vitamin D and incident dementia and cognitive impairment." <u>American Journal of Clinical Nutrition</u> <b>106</b> (2): 699-700.                                                                                                                                                                                                  | Response                   |
| 23 | Hamer, M., et al. (2016). "Depressive symptoms and obesity: Instrumental variable analysis using mother-offspring pairs in the 1970 British Cohort Study." <u>International Journal of Obesity</u> <b>40</b> (11): 1789-1793.                                                                                                                            | Exposure (obesity)         |
| 24 | Hannon, E., et al. (2019). "Pleiotropic Effects of Genetic Variation Associated with Psychiatric Disorders on DNA Methylation." <u>European Neuropsychopharmacology</u> <b>29</b> (Supplement 3): S984-S985.                                                                                                                                             | Exposure (DNA methylation) |
| 25 | Harbord, R. M., et al. (2010). "Genetically determined adiposity and reduced risk of common mental disorder. the copenhagen general population study with 53,221 participants." <u>American Journal of Epidemiology</u> <b>111</b> : S52.                                                                                                                | Exposure (adiposity)       |
| 26 | Harbord, R. M., et al. (2011). "Using genetic loci to understand the relationship between adiposity and psychological distress: A Mendelian Randomization study in the Copenhagen General Population Study of 53221 adults." <u>Journal of Internal Medicine</u> <b>269</b> (5): 525-537.                                                                | Exposure (adiposity)       |
| 27 | Hartwig, F. P., et al. (2016). "Body mass index and psychiatric disorders: a Mendelian randomization study." <u>Scientific Reports</u> <b>6</b> : 32730.                                                                                                                                                                                                 | Exposure (BMI)             |
| 28 | Hu, Q., et al. (2016). "Homocysteine and Alzheimer's disease: Evidence for a causal link from Mendelian randomization." <u>Journal of Alzheimer's Disease</u> <b>52</b> (2): 747-756.                                                                                                                                                                    | Included                   |
| 29 | Hung, C. F., et al. (2014). "Relationship between obesity and the risk of clinically significant depression: Mendelian randomisation study." <u>British Journal of Psychiatry</u> <b>205</b> (1): 24-28.                                                                                                                                                 | Exposure (obesity)         |
| 30 | Jiang, L., et al. (2019). "Constrained instruments and their application to Mendelian randomization with pleiotropy." <u>Genetic Epidemiology</u> <b>12</b> : 12.                                                                                                                                                                                        | Review                     |
| 31 | Jokela, M., et al. (2012). "Body mass index and depressive symptoms: Instrumental-variables regression with genetic risk score." <u>Genes, Brain &amp; Behavior</u> <b>11</b> (8): 942-948.                                                                                                                                                              | Exposure (BMI)             |
| 32 | Jorde, R., et al. (2015). "Vitamin D and cognitive function: The Tromso study." <u>Journal of the Neurological Sciences</u> <b>355</b> (1-2): 155-161.                                                                                                                                                                                                   | Included                   |

|    |                                                                                                                                                                                                                                                                                   |                                |
|----|-----------------------------------------------------------------------------------------------------------------------------------------------------------------------------------------------------------------------------------------------------------------------------------|--------------------------------|
| 33 | Khandaker, G. M., et al. (2019). "Shared mechanisms between coronary heart disease and depression: findings from a large UK general population-based cohort." <u>Molecular Psychiatry</u> <b>19</b> : 19.                                                                         | Included                       |
| 34 | Kinoshita, M. (2015). "One-carbon Metabolism and Schizophrenia. [Japanese]." <u>Seishin shinkeigaku zasshi = Psychiatria et neurologia Japonica</u> <b>117</b> (5): 362-368.                                                                                                      | Included                       |
| 35 | Kivimaki, M., et al. (2011). "Does obesity really protect against psychological distress? Examining the 'fat-jolly' versus 'fat-sad' hypotheses using Mendelian randomization." <u>Journal of Internal Medicine</u> <b>269</b> (5): 519-520.                                      | Exposure (obesity)             |
| 36 | Kivimaki, M., et al. (2011). "Examining Overweight and Obesity as Risk Factors for Common Mental Disorders Using Fat Mass and Obesity-Associated (FTO) Genotype-Instrumented Analysis." <u>American Journal of Epidemiology</u> <b>173</b> (4): 421-429.                          | Exposure (obesity)             |
| 37 | Koshy, B., et al. (2010). "Genetic deficiency of plasma lipoprotein-associated phospholipase A $\leq 2$ (PLA2G7 V297F null mutation) and risk of Alzheimer's disease in Japan." <u>Journal of Alzheimer's Disease</u> <b>21</b> (3): 775-780.                                     | Exposure (inflammatory marker) |
| 38 | Kubzansky, L. D., et al. (2015). "Revisiting mendelian randomization studies of the effect of body mass index on depression." <u>American Journal of Medical Genetics, Part B: Neuropsychiatric Genetics</u> <b>168</b> (2): 108-115.                                             | Exposure (BMI)                 |
| 39 | Kumari, M., et al. "Alcohol consumption and cognitive performance: a Mendelian randomization study." <u>Addiction</u> <b>109</b> (9): 1462-1471.                                                                                                                                  | Exposure (alcohol)             |
| 40 | Kunutsor, S. K., et al. "Genetically elevated gamma-glutamyltransferase and Alzheimer's disease." <u>Experimental Gerontology</u> <b>106</b> : 61-66.                                                                                                                             | Exposure (iver enzymes)        |
| 41 | Kuzma, E., et al. (2017). "A systematic review of mendelian randomization studies investigating causal associations between risk factors and dementia." <u>Alzheimer's and Dementia</u> <b>13</b> (7): P1180.                                                                     | Review                         |
| 42 | Kuzma, E., et al. (2018). "Which Risk Factors Causally Influence Dementia? A Systematic Review of Mendelian Randomization Studies." <u>Journal of Alzheimer's Disease</u> <b>64</b> (1): 181-193.                                                                                 | Review                         |
| 43 | Kwok, M. K., et al. "Habitual coffee consumption and risk of type 2 diabetes, ischemic heart disease, depression and Alzheimer's disease: a Mendelian randomization study." <u>Scientific Reports</u> <b>6</b> : 36500.                                                           | Expoure (coffee/caffeine)      |
| 44 | Larsson, S. C., et al. "Modifiable pathways in Alzheimer's disease: Mendelian randomisation analysis." <u>BMJ</u> <b>359</b> : j5375.                                                                                                                                             | Included                       |
| 45 | Larsson, S. C., et al. (2018). "Serum Parathyroid Hormone, 25-Hydroxyvitamin D, and Risk of Alzheimer's Disease: A Mendelian Randomization Study." <u>Nutrients</u> <b>10</b> (9): 06.                                                                                            | Included                       |
| 46 | Lauritzen, L., et al. "Mendelian randomization shows sex-specific associations between long-chain PUFA-related genotypes and cognitive performance in Danish schoolchildren." <u>American Journal of Clinical Nutrition</u> <b>106</b> (1): 88-95.                                | Outcome (non-psychiatric)      |
| 47 | Lawlor, D. A., et al. "Using genetic loci to understand the relationship between adiposity and psychological distress: a Mendelian Randomization study in the Copenhagen General Population Study of 53,221 adults." <u>Journal of Internal Medicine</u> <b>269</b> (5): 525-537. | Exposure (adiposity)           |
| 48 | Lehmann, D. J. and M. Cortina-Borja (2019). "Genetic influence of plasma homocysteine on Alzheimer's disease." <u>Neurobiology of Aging</u> <b>76</b> : 217-218.                                                                                                                  | Review                         |
| 49 | Lewis, S. J., et al. "Maternal iron levels early in pregnancy are not associated with offspring IQ score at age 8, findings from a Mendelian                                                                                                                                      | Maternal/ Offspring            |

|    |                                                                                                                                                                                                                                                                   |                                                          |
|----|-------------------------------------------------------------------------------------------------------------------------------------------------------------------------------------------------------------------------------------------------------------------|----------------------------------------------------------|
|    | randomization study." <u>European Journal of Clinical Nutrition</u> <b>68</b> (4): 496-502.                                                                                                                                                                       |                                                          |
| 50 | Li, Z., et al. (2018). "Glucose and Insulin-Related Traits, Type 2 Diabetes and Risk of Schizophrenia: A Mendelian Randomization Study." <u>EBioMedicine</u> <b>34</b> : 182-188.                                                                                 | Included                                                 |
| 51 | Ligthart, S., et al. "Genome Analyses of >200,000 Individuals Identify 58 Loci for Chronic Inflammation and Highlight Pathways that Link Inflammation and Complex Disorders." <u>American Journal of Human Genetics</u> <b>103</b> (5): 691-706.                  | Exposure (CRP)                                           |
| 52 | Liu, G., et al. (2018). "Circulating vitamin E levels and Alzheimer's disease: A Mendelian randomization study." <u>Neurobiology of Aging</u> <b>72</b> : 189.                                                                                                    | Included                                                 |
| 53 | Lund, I. O., et al. (2019). "Is the association between maternal alcohol consumption in pregnancy and pre-school child behavioural and emotional problems causal? Multiple approaches for controlling unmeasured confounding." <u>Addiction</u> <b>08</b> : 08.   | Maternal/offspring                                       |
| 54 | Mack, S., et al. "Evaluating the Causal Relation of ApoA-IV with Disease-Related Traits - A Bidirectional Two-sample Mendelian Randomization Study." <u>Scientific Reports</u> <b>7</b> (1): 8734.                                                                | Outcomes (lipids, renal function/adiposity and diabetes) |
| 55 | Maddock, J., et al. (2017). "Vitamin D and cognitive function: A Mendelian randomisation study." <u>Sci Rep</u> <b>7</b> (1): 13230.                                                                                                                              | Included                                                 |
| 56 | Mejia-Guevara, I., et al. (2013). "The causal effect of obesity on anxiety: genetic iv analyses in the hrs study." <u>American Journal of Epidemiology</u> <b>11</b> ): S13.                                                                                      | Exposure (obesity)                                       |
| 57 | Michaelsson, K., et al. (2018). "Serum 25-Hydroxyvitamin D Concentrations and Major Depression: A Mendelian Randomization Study." <u>Nutrients</u> <b>10</b> (12): 15.                                                                                            | Included                                                 |
| 58 | Mokry, L. E., et al. (2016). "Genetically decreased Vitamin D and risk of Alzheimer disease." <u>Neurology</u> <b>87</b> (24): 2567-2574.                                                                                                                         | Included                                                 |
| 59 | Mollehave, L. T., et al. (2017). "Association studies of genetic scores of serum vitamin B12 and folate levels with symptoms of depression and anxiety in two danish population studies." <u>European Journal of Clinical Nutrition</u> <b>71</b> (9): 1054-1060. | Included                                                 |
| 60 | Mukherjee, S., et al. (2015). "Genetically predicted body mass index and Alzheimer's disease-related phenotypes in three large samples: Mendelian randomization analyses." <u>Alzheimer's and Dementia</u> <b>11</b> (12): 1439-1451.                             | Exposure (BMI)                                           |
| 61 | Murray, J., et al. (2016). "Moderate alcohol drinking in pregnancy increases risk for children's persistent conduct problems: Causal effects in a Mendelian randomisation study." <u>Journal of Child Psychology and Psychiatry</u> <b>57</b> (5): 575-584.       | Maternal/Offspring                                       |
| 62 | Nigg, J. T., et al. (2016). "Variation in an iron metabolism gene moderates the association between blood lead levels and attention-deficit/hyperactivity disorder in children." <u>Psychological Science</u> <b>27</b> (2): 257-269.                             | Methods (moderation analysis)                            |
| 63 | Nishi, A., et al. (2014). "Meta-analyses of blood homocysteine levels for gender and genetic association studies of the MTHFR C677T polymorphism in schizophrenia." <u>Schizophrenia Bulletin</u> <b>40</b> (5): 1154-1163.                                       | Review                                                   |
| 64 | Nordestgaard, B. G., et al. (2017). "Low LDL cholesterol, PCSK9 and HMGCR genetic variation, and risk of Alzheimer's disease and Parkinson's disease: Mendelian randomisation study." <u>BMJ (Clinical research ed.)</u> <b>357</b> : j1648.                      | Duplicate of Benn 2017 (included)                        |

|    |                                                                                                                                                                                                                                                        |                                |
|----|--------------------------------------------------------------------------------------------------------------------------------------------------------------------------------------------------------------------------------------------------------|--------------------------------|
| 65 | Nordestgaard, L. T., et al. (2017). "Body mass index and risk of Alzheimer's disease: A mendelian randomization study of 399,536 individuals." <u>Journal of Clinical Endocrinology and Metabolism</u> <b>102</b> (7): 2310-2320.                      | Exposure (BMI)                 |
| 66 | Numata, S., et al. "Evaluation of an association between plasma total homocysteine and schizophrenia by a Mendelian randomization analysis." <u>BMC Medical Genetics</u> <b>16</b> : 54.                                                               | Included                       |
| 67 | Olsson, E., et al. (2017). "Vitamin D is not associated with incident dementia or cognitive impairment: An 18-y follow-up study in community-living old men." <u>American Journal of Clinical Nutrition</u> <b>105</b> (4): 936-943.                   | Included                       |
| 68 | Olsson, E., et al. (2015). "Vitamin D does not predict dementia or cognitive impairment-a 20 year follow up study in community living old men." <u>Clinical Nutrition</u> <b>1</b> : S15.                                                              | Conference abstract            |
| 69 | Ostergaard, S. D., et al. "Associations between Potentially Modifiable Risk Factors and Alzheimer Disease: A Mendelian Randomization Study." <u>PLoS Medicine / Public Library of Science</u> <b>12</b> (6): e1001841; discussion e1001841.            | Included                       |
| 70 | Pagoni, P., et al. (2019). "Using Mendelian randomisation to assess causality in observational studies." <u>Evidence Based Mental Health</u> <b>12</b> : 12.                                                                                           | Exposure (BMI)                 |
| 71 | Peterson, R., et al. (2019). "Investigation of the Genetic Overlap between Major Depressive Disorder and Body Mass Index in Han Chinese Women." <u>European Neuropsychopharmacology</u> <b>29</b> (Supplement 3): S976.                                | Exposure (BMI)                 |
| 72 | Peterson, R. E., et al. (2019). "Evidence of causal effect of major depression on alcohol dependence: findings from the psychiatric genomics consortium." <u>Psychological Medicine</u> : 1-9.                                                         | Exposure (alcohol)             |
| 73 | Polimanti, R., et al. (2018). "Genetically determined schizophrenia is not associated with impaired glucose homeostasis." <u>Schizophrenia Research</u> <b>195</b> : 286-289.                                                                          | Schizophrenia used as exposure |
| 74 | Polimanti, R., et al. "Evidence of causal effect of major depression on alcohol dependence: findings from the psychiatric genomics consortium." <u>Psychological Medicine</u> : 1-9.                                                                   | Exposure (alcohol)             |
| 75 | Proitsi, P., et al. "Genetic predisposition to increased blood cholesterol and triglyceride lipid levels and risk of Alzheimer disease: a Mendelian randomization analysis." <u>PLoS Medicine / Public Library of Science</u> <b>11</b> (9): e1001713. | Included                       |
| 76 | Rasmussen, K. L., et al. (2018). "Plasma apolipoprotein E levels and risk of dementia: A Mendelian randomization study of 106,562 individuals." <u>Alzheimer's &amp; Dementia: The Journal of the Alzheimer's Association</u> <b>14</b> (1): 71-80.    | Included                       |
| 77 | Reed, Z. E., et al. "Assessing the causal role of adiposity on disordered eating in childhood, adolescence, and adulthood: a Mendelian randomization analysis." <u>American Journal of Clinical Nutrition</u> <b>106</b> (3): 764-772.                 | Exposure (adiposity)           |
| 78 | Romo, M. L. and C. M. Schooling (2017). "Examining the Causal Role of Leptin in Alzheimer Disease: A Mendelian Randomization Study." <u>Neuroendocrinology</u> <b>105</b> (2): 182-188.                                                                | Exposure                       |
| 79 | Roostaei, T., et al. (2018). "Genetic influence of plasma homocysteine on Alzheimer's disease." <u>Neurobiology of Aging</u> <b>62</b> : e7-e14.                                                                                                       | Included                       |
| 80 | Ruseski, J. E., et al. "Sport participation and subjective well-being: instrumental variable results from German survey data." <u>Journal of Physical Activity &amp; Health</u> <b>11</b> (2): 396-403.                                                | Exposure/ outcome/ methods     |



|    |                                                                                                                                                                                                                                                      |                         |
|----|------------------------------------------------------------------------------------------------------------------------------------------------------------------------------------------------------------------------------------------------------|-------------------------|
| 81 | Sallis, H., et al. (2014). "Perinatal depression and omega-3 fatty acids: A Mendelian randomisation study." <u>Journal of Affective Disorders</u> <b>166</b> : 124-131.                                                                              | Included                |
| 82 | Smith, A. D. and H. Refsum (2016). "Homocysteine, B Vitamins, and Cognitive Impairment." <u>Annual Review of Nutrition</u> <b>36</b> : 211-239.                                                                                                      | Review                  |
| 83 | Smulders, Y. M. and H. J. Blom "The homocysteine controversy." <u>Journal of Inherited Metabolic Disease</u> <b>34</b> (1): 93-99.                                                                                                                   | Review                  |
| 84 | So, H. C., et al. "Exploring shared genetic bases and causal relationships of schizophrenia and bipolar disorder with 28 cardiovascular and metabolic traits." <u>Psychological Medicine</u> : 1-13.                                                 | Methods (non-MR)        |
| 85 | Taylor, A. E., et al. (2016). "Investigating causality in the association between 25(OH)D and schizophrenia." <u>Scientific Reports</u> <b>6</b> : 26496.                                                                                            | Included                |
| 86 | Tomioka, Y., et al. (2018). "Decreased serum pyridoxal levels in schizophrenia: Meta-analysis and Mendelian randomization analysis." <u>Journal of Psychiatry &amp; Neuroscience</u> <b>43</b> (3): 194-200.                                         | Included                |
| 87 | Tyrrell, J., et al. (2018). "Using genetics to understand the causal influence of higher BMI on depression." <u>International Journal of Epidemiology</u> <b>13</b> : 13.                                                                            | Exposure (BMI)          |
| 88 | Vaez, A., et al. (2018). "Genome Analyses of >200,000 Individuals Identify 58 Loci for Chronic Inflammation and Highlight Pathways that Link Inflammation and Complex Disorders." <u>American Journal of Human Genetics</u> <b>103</b> (5): 691-706. | Exposure (inflammation) |
| 89 | van den Broek, N., et al. "Causal associations between body mass index and mental health: a Mendelian randomisation study." <u>Journal of Epidemiology &amp; Community Health</u> <b>72</b> (8): 708-710.                                            | Exposure (BMI)          |
| 90 | Vaucher, J., et al. "Cannabis use and risk of schizophrenia: a Mendelian randomization study." <u>Molecular Psychiatry</u> <b>23</b> (5): 1287-1292.                                                                                                 | Exposure (cannabis)     |
| 91 | Walter, S., et al. (2015). "Do genetic risk scores for body mass index predict risk of phobic anxiety? Evidence for a shared genetic risk factor." <u>Psychological Medicine</u> <b>45</b> (1): 181-191.                                             | Exposure (BMI)          |
| 92 | Walter, S., et al. (2015). "Revisiting Mendelian Randomization studies of the effect of body mass index on depression." <u>American Journal of Medical Genetics Part B: Neuropsychiatric Genetics</u> <b>168</b> (2): 108-115.                       | Exposure (BMI)          |
| 93 | Walter, S., et al. (2016). "Diabetic phenotypes and late-life dementia risk: A mechanism-specific Mendelian Randomization study." <u>Alzheimer Disease and Associated Disorders</u> <b>30</b> (1): 15-20.                                            | Included                |
| 94 | Walter, S., et al. (2013). "A genetic iv analysis to assess the effect of body mass index on depression in the health and retirement study." <u>American Journal of Epidemiology</u> <b>11</b> : S12.                                                | Exposure (BMI)          |
| 95 | Wesolowska, K., et al. (2015). "Type-2 diabetes and depressive symptoms: Results of applying a Mendelian randomization in the Cardiovascular Risk in Young Finns Study." <u>Psychotherapy and Psychosomatics</u> <b>1</b> : 77.                      | Conference abstract     |
| 96 | Wesolowska, K., et al. (2017). "Fasting glucose and the risk of depressive symptoms: Instrumental-variable regression in the Cardiovascular Risk in Young Finns Study." <u>International Journal of Behavioral Medicine</u> <b>24</b> (6): 901-907.  | Included                |
| 97 | Wu, S. P., et al. (2017). "Plasma homocysteine levels and risk of vascular dementia: A Mendelian randomization study." <u>International Journal of Clinical and Experimental Medicine</u> <b>10</b> (6): 9142-9151.                                  | Included                |

|    |                                                                                                                                                                             |                 |
|----|-----------------------------------------------------------------------------------------------------------------------------------------------------------------------------|-----------------|
| 98 | Xuan, L., et al. (2018). "Type 2 diabetes is causally associated with depression: a Mendelian randomization analysis." <u>Frontiers of medicine</u> <b>12</b> (6): 678-687. | Exposure (T2DM) |
|----|-----------------------------------------------------------------------------------------------------------------------------------------------------------------------------|-----------------|
